# Supplementary material
Source: MDPI journal article supplement (https://www.mdpi.com/2673-7159/3/4/36)
Supplement: s1 [file s1]

## Table S1. Key data selected from historical and contemporary sources used previously (Flueck and Smith-Flueck 2012, Flueck et al. 2022) [1,2]

| Text considered relevant for huemul conservation                                                                                                                                                                               |                                                                                                                                                                                                                                                                                                                                                                                                                                                                                                                                                                                                                                                                                                                                                                                                                                                                                                                                                                                                                                                                                                                                                                                                                                                                                                                                                                                                                                                                                                                                                                                                                                                                                                                                                                                                                                                                                                                                                                                                                                                                                                                                                                                                                                                                                                                                                                                                                                                                                                                                                                                                                                                                                                                                                                                                                                                                                                                                                                                                                                                                                                                                                                                                                                                                                                                                                                                                                                                                                                                                                                                                                                                                                                                                     |
|--------------------------------------------------------------------------------------------------------------------------------------------------------------------------------------------------------------------------------|-------------------------------------------------------------------------------------------------------------------------------------------------------------------------------------------------------------------------------------------------------------------------------------------------------------------------------------------------------------------------------------------------------------------------------------------------------------------------------------------------------------------------------------------------------------------------------------------------------------------------------------------------------------------------------------------------------------------------------------------------------------------------------------------------------------------------------------------------------------------------------------------------------------------------------------------------------------------------------------------------------------------------------------------------------------------------------------------------------------------------------------------------------------------------------------------------------------------------------------------------------------------------------------------------------------------------------------------------------------------------------------------------------------------------------------------------------------------------------------------------------------------------------------------------------------------------------------------------------------------------------------------------------------------------------------------------------------------------------------------------------------------------------------------------------------------------------------------------------------------------------------------------------------------------------------------------------------------------------------------------------------------------------------------------------------------------------------------------------------------------------------------------------------------------------------------------------------------------------------------------------------------------------------------------------------------------------------------------------------------------------------------------------------------------------------------------------------------------------------------------------------------------------------------------------------------------------------------------------------------------------------------------------------------------------------------------------------------------------------------------------------------------------------------------------------------------------------------------------------------------------------------------------------------------------------------------------------------------------------------------------------------------------------------------------------------------------------------------------------------------------------------------------------------------------------------------------------------------------------------------------------------------------------------------------------------------------------------------------------------------------------------------------------------------------------------------------------------------------------------------------------------------------------------------------------------------------------------------------------------------------------------------------------------------------------------------------------------------------------|
| Pennant (1793)                                                                                                                                                                                                                 | Only remaining in <b>highest and inaccessible parts</b> of Andes, and therefore difficult to take [hunt]<br>Byron saw ... a <b>deer</b> ... first animal seen in the Strait of Magellan, except at entrance where we found <b>guanacos</b><br>Huemel (Equus bisulcus) has been seen at <b>Port Desire</b> (pg. 15)                                                                                                                                                                                                                                                                                                                                                                                                                                                                                                                                                                                                                                                                                                                                                                                                                                                                                                                                                                                                                                                                                                                                                                                                                                                                                                                                                                                                                                                                                                                                                                                                                                                                                                                                                                                                                                                                                                                                                                                                                                                                                                                                                                                                                                                                                                                                                                                                                                                                                                                                                                                                                                                                                                                                                                                                                                                                                                                                                                                                                                                                                                                                                                                                                                                                                                                                                                                                                  |
| MacDouall (1833), pg. 157, 163, 167<br>Roulin (1835), pg. 10-11                                                                                                                                                                | Outside of dwellings hang <b>several heads and shoulders of deer</b> ; ...cooking portions of venison; <b>Gregory Bay</b> (= some 100 km from next forest)<br>The name ' <b>Anta</b> ' is still used twice: once for a quadruped common around the port of <b>Saint-Julien</b> , and then for animals which are found on shores along the Strait of Magellan. <b>There are also guanaco</b> , but the other is probably a large, quadruped that was seen several times around the strait, perhaps the one that Molina designated by the name of <b>huemul</b> (Equus bisulcus).<br>Very rare in Chile, <b>only occur at high edges of mountains</b> => this indicates that <b>no more migration</b> was occurring<br>Saw a <b>deer</b> [huemul] at "Deer Port", and found a dead <b>guanaco</b> nearby; this deer was at lowest elevation in summer, thus a <b>resident deer</b><br>Summer: Natives in <b>valleys</b> with plenty of <b>guanacos</b> and similarly <b>numerous huemul</b> : <b>all-year residents</b> ; Natives <b>trade skins or use them</b> for making tents; over 50 years of <b>trading huemul products through Carmen de Patagones via Buenos Aires to Europa</b> (i.e. <b>since 1785</b> )<br>The valley Henno was at least 20 miles wide, lying about 50 feet below the eastern plains; I killed a <b>deer</b> ; next day we traversed a gradually-rising <b>grassy plain</b> towards the mountains<br>Natives hunt <b>huemul</b> for skins and meat in <b>areas also containing guanaco</b>                                                                                                                                                                                                                                                                                                                                                                                                                                                                                                                                                                                                                                                                                                                                                                                                                                                                                                                                                                                                                                                                                                                                                                                                                                                                                                                                                                                                                                                                                                                                                                                                                                                                                                                                                                                                                                                                                                                                                                                                                                                                                                                                                                                                                |
| Gay (1847), pg. 161<br>Cox (1863), pg. 69,73<br>Claraz (1864), pg. 242,245                                                                                                                                                     | He mentioned <b>huemul fur trade via Valdivia, Chile</b><br>Mules driven down from mountain pasturage to a corral, arrived with a <b>huemul</b> which was lassoed and killed<br>The research team hunted several <b>huemul</b> in <b>ecotonal Patagonian meseta</b> ; he mentioned <b>huemul parts being taken to Punta Arenas, Chile for trading</b> , including heads with velvet<br>Published in London, UK: <b>huemul</b> figures in the manual of ready reference for all those <b>species which are commercially important</b><br><b>Where there are people, huemul remain only in high mountains</b><br>His team shot <b>huemul</b> some <b>50 km east from forests</b><br>Huemul by Morro Philippi, <b>120 km from continental divide</b> ; Natives exchanged hides for sugar, alcohol, etc.; <b>deer hides were traded</b> via Punta Arenas in Chile; <b>huemul occurring with guanaco</b>                                                                                                                                                                                                                                                                                                                                                                                                                                                                                                                                                                                                                                                                                                                                                                                                                                                                                                                                                                                                                                                                                                                                                                                                                                                                                                                                                                                                                                                                                                                                                                                                                                                                                                                                                                                                                                                                                                                                                                                                                                                                                                                                                                                                                                                                                                                                                                                                                                                                                                                                                                                                                                                                                                                                                                                                                                 |
| Musters (1871)                                                                                                                                                                                                                 | <b>Migrating</b> down...; they were hunted by <b>natives who take skins to Carmen and Bahia Blanca on the Atlantic for trading</b><br>The range of <b>guanaco crosses that of the huemul</b> ; during the summer these deer leave the lower grounds and travel up to the snow-line; we could <b>very easily shoot ten huemules in a day</b> ; tracks of <b>guanaco and huemul in steppe</b> (pg. 133); saw <b>huemul in steppe</b> by River de Los Antiguos (pg. 145); I had <b>just shot a guanaco, when a huemul buck dashed past me within twenty yards</b> (steppe, pg. 240); huemul seen east of Lake Buenos Aires <b>some 100 km from forests</b> , the natives said that <b>earlier they were more numerous in that region</b> (pg. 249)<br><b>Groups of huemul (6 and 12) some 220 east km from forests, they shot two</b><br>Saw <b>some 100 individuals in a group</b><br>The <b>Patagonian plains are the home of guanaco and huemul</b>                                                                                                                                                                                                                                                                                                                                                                                                                                                                                                                                                                                                                                                                                                                                                                                                                                                                                                                                                                                                                                                                                                                                                                                                                                                                                                                                                                                                                                                                                                                                                                                                                                                                                                                                                                                                                                                                                                                                                                                                                                                                                                                                                                                                                                                                                                                                                                                                                                                                                                                                                                                                                                                                                                                                                                                 |
| Burmeister (1873)<br>Philippi (1873), pg. 721<br>Schlater (1875), pg. 44<br>Behm (1880), pg. 53, 54                                                                                                                            | <b>Saw huemul</b> frequently in the <b>meseta some 100 km from the next forest</b> ; and <b>regularly hunted them</b> for meat as it was better than guanaco meat<br><b>Huemel</b> are in Patagonia <b>plains, over 100 km from forest</b> ; <b>very easy to hunt</b> : once I was in grasslands, a gaucho went slowly to a female to <b>kill her with a knife</b> , but leaving me enough time to photograph all, and she was not afraid; <b>huemul overlap with guanaco</b> ; <b>huemul is close to extinction</b><br><b>Photo of huemul hunted by the governor of Chubut in 1904, at 270 km east of the continental divide</b><br>Huemul were <b>easy to hunt</b> and constantly provided meat for their crew; <b>huemul occurred in unsettled valley bottoms, often abundant</b> ; they were in <b>steppe areas together with guanaco</b><br><b>Populated central Chile: huemul only in high Andes</b> ; unpopulated Magellan they were still abundant; <b>ranchers by Lake Argentino fed huemul coming down in winter</b> (pg. 233); seasonal <b>migration</b><br>Winter <b>migration down to valleys</b> ; they are <b>hunted also to export their skins</b> via Carmen and Bahia Blanca, Atlantic coast (pg. 31)<br>Pigafetta: horseless <b>hunters with skin clothes</b> from a beast like a mule, body like camel and tail of horse (this was a common description for huemul) at <b>Port San Julian</b> ; Van Noort: found beasts like <b>stagges</b> (= cervid, thus huemul) at <b>Port Desire</b> ; by <b>Atlantic coast</b><br><b>Hunted huemul on a practically open hill side, 500 m from any cover</b> , "and just beyond, on the side of a small gully, were five <b>guanacos</b> "<br>Native women grilled fresh-killed <b>huemul</b> , while men were using horses in <b>steppe</b> area; if no huemul available, they would eat <b>guanaco or ostrich</b><br><b>Huemel</b> in summer mainly up to snow line; <b>guanaco also up to snow line in summer</b> , but also occurs in steppe plains; <b>saw guanaco and a little later two huemul in grasslands some 35 km east from the next forest</b> ; several <b>huemul were hunted</b> and consumed, <b>with help of natives on horseback, using boleadoras</b> (similar to lasso)                                                                                                                                                                                                                                                                                                                                                                                                                                                                                                                                                                                                                                                                                                                                                                                                                                                                                                                                                                                                                                                                                                                                                                                                                                                                                                                                                                                                                                                                              |
| Simmonds (1883), pg. 61<br>Philippi (1892)<br>Burmeister (1893), pg. 345)<br>Siewert (1896), pg. 377-379                                                                                                                       | Seasonal <b>migration and large herds in winter</b><br>Huemul were seasonally <b>migratory</b> ; <b>groups of 50 or more</b> had been seen in the past; <b>colonists hunted many huemul to feed dogs, chicken and pigs</b> ; <b>skins were used to construct shelters for domestic animals</b><br>In the past, <b>huemul were frequently hunted to export skins</b> via Carmen and Bahia Blanca<br>That huemul only remain in high mountains is surprising (pg. 171); <b>in quiet areas, huemul remain as residents in low areas all the time</b> (pg. 173)<br>Huemul are <b>very easy to kill</b> : he shot one of four, then "I walked toward the nearest one and he flicked his tail quickly but would not retreat. <b>I was within 10 meters of him and picked up a pebble and threw or rather tossed it at him and even this would not put him to flight</b><br><b>Guanacos and huemul grazed by the thousands on the plains and in the mountains</b> (pg. 172)<br>At Lake Viedma, we found only <b>guanacos and deer, which quietly grazed</b> in the solitude of these Andean valleys (pg. 360)<br><b>All these quiet valleys were completely uninhabited</b> and unknown, and <b>endless herds of guanacos and deer</b> could be seen everywhere (pg. 430)<br>They are <b>on the best way to extinction</b> ; there used to be <b>large herds in valleys</b> and mountains of Chile; <b>colonists are getting into the last valleys, hunting deer for meat and for their dogs</b> ; by Lago San Martin, <b>many ranches had every window and door closed with huemul skins</b> ; saw groups of up to <b>10 deer, got to 6 m and walked among them and photographed/filmed them</b> (material is available)<br>Between Andean Mountain foothills and <b>Patagonian mesas, by Lake Sarmiento, reaching the Atlantic Coast</b><br>huemul went down in winter; <b>a man killed 13 in one winter</b> (1927) => indicating seasonal migration behavior<br>Huemul remains found in <b>steppe some 100 km from forests</b><br>Indians hunted huemul for meat and skins; <b>normally huemul descend to protected valleys and precordillera in winter</b> ; as huemul <b>now need to remain in higher places, they will suffer</b> during harsh years, from <b>malnutrition</b> , and with consequences to their offspring; <b>animals weakened from malnutrition area more prone to disease and easier prey to natural predators, which contributes to reducing their numbers</b><br>By Lago Argentino, <b>ranchers could capture 15 huemul in corrals</b> , resulting in huemul being <b>taken to the Buenos Aires Zoo in 1932; in that region, some 2000 huemul were killed each year by ranchers to feed dogs and chicken</b> besides their own consumption (pg. 27)<br>Until 1850s huemul still occurred in <b>Patagonian flatlands</b> ; they were <b>first hunted heavily by natives and then also by colonists</b> ; they were still numerous recently between Lago Buenos Aires and Argentino, and still <b>thousands per year were shot for meat for ranch dogs</b> (pg. 31); now they are <b>practically extinct, and only left in high mountains where they are refuged</b><br><b>Once humans arrived and hunted them, they only survived in mountains. For this reason, one can frequently find old antlers in the valleys</b><br>The northern limit of <b>huemul was 30°S</b> in Chile; that huemul and guanaco were nearly extinct by the time of the first Spanish arrivals<br>Huemul remains found at <b>110 km east from forests</b><br>Huemul remains found at <b>190 km east from forests</b><br>Huemul remains found at <b>85 km east from forests</b><br>Huemul remains found at <b>35 km east from forests</b> |
| Lydekker (1898), pg. 297<br>Prichard (1902a)                                                                                                                                                                                   | To provide better protections, <b>Chile proposed in 1902 to charge an export tax for huemul skin hides</b><br>During the late Pleistocene <b>huemul reached 31°S</b> in <b>Chile</b><br>Past hunting was severe, and <b>where guanacos were accessible, most were hunted out: the guanaco population has declined by more than 95%; the amazingly approachable huemul, which formerly ranged over much of the steppe, is now found only in the southern Andean mountains</b><br>Huemul occurrence at <b>60 km east from forests</b><br>Huemul remains found at <b>30 km east from forests</b><br><b>Huemel ate more grasses than tree leaves</b> (pg. 46); Ultima Esperanza: 1893-1900, colonist von Heinz had big collections of huemul heads and <b>hunting was so strong, that in few years there was local extinctions</b> (pg. 73)                                                                                                                                                                                                                                                                                                                                                                                                                                                                                                                                                                                                                                                                                                                                                                                                                                                                                                                                                                                                                                                                                                                                                                                                                                                                                                                                                                                                                                                                                                                                                                                                                                                                                                                                                                                                                                                                                                                                                                                                                                                                                                                                                                                                                                                                                                                                                                                                                                                                                                                                                                                                                                                                                                                                                                                                                                                                                             |
| Lydekker (1898), pg. 297<br>Prichard (1902a)                                                                                                                                                                                   |                                                                                                                                                                                                                                                                                                                                                                                                                                                                                                                                                                                                                                                                                                                                                                                                                                                                                                                                                                                                                                                                                                                                                                                                                                                                                                                                                                                                                                                                                                                                                                                                                                                                                                                                                                                                                                                                                                                                                                                                                                                                                                                                                                                                                                                                                                                                                                                                                                                                                                                                                                                                                                                                                                                                                                                                                                                                                                                                                                                                                                                                                                                                                                                                                                                                                                                                                                                                                                                                                                                                                                                                                                                                                                                                     |
| Burmeister (1901), pg. 83<br>Prichard (1902b), pg. 249<br>Church (1903), pg. 321, 322<br>Hatcher (1903), pg. 185<br>Onelli (1905)                                                                                              |                                                                                                                                                                                                                                                                                                                                                                                                                                                                                                                                                                                                                                                                                                                                                                                                                                                                                                                                                                                                                                                                                                                                                                                                                                                                                                                                                                                                                                                                                                                                                                                                                                                                                                                                                                                                                                                                                                                                                                                                                                                                                                                                                                                                                                                                                                                                                                                                                                                                                                                                                                                                                                                                                                                                                                                                                                                                                                                                                                                                                                                                                                                                                                                                                                                                                                                                                                                                                                                                                                                                                                                                                                                                                                                                     |
| Anonymous (1904)<br>Steffen (1910)                                                                                                                                                                                             |                                                                                                                                                                                                                                                                                                                                                                                                                                                                                                                                                                                                                                                                                                                                                                                                                                                                                                                                                                                                                                                                                                                                                                                                                                                                                                                                                                                                                                                                                                                                                                                                                                                                                                                                                                                                                                                                                                                                                                                                                                                                                                                                                                                                                                                                                                                                                                                                                                                                                                                                                                                                                                                                                                                                                                                                                                                                                                                                                                                                                                                                                                                                                                                                                                                                                                                                                                                                                                                                                                                                                                                                                                                                                                                                     |
| Wolffsohn (1910)                                                                                                                                                                                                               |                                                                                                                                                                                                                                                                                                                                                                                                                                                                                                                                                                                                                                                                                                                                                                                                                                                                                                                                                                                                                                                                                                                                                                                                                                                                                                                                                                                                                                                                                                                                                                                                                                                                                                                                                                                                                                                                                                                                                                                                                                                                                                                                                                                                                                                                                                                                                                                                                                                                                                                                                                                                                                                                                                                                                                                                                                                                                                                                                                                                                                                                                                                                                                                                                                                                                                                                                                                                                                                                                                                                                                                                                                                                                                                                     |
| Neveu-Lemaire and Grandidier (1911)<br>Eastman (1915)                                                                                                                                                                          |                                                                                                                                                                                                                                                                                                                                                                                                                                                                                                                                                                                                                                                                                                                                                                                                                                                                                                                                                                                                                                                                                                                                                                                                                                                                                                                                                                                                                                                                                                                                                                                                                                                                                                                                                                                                                                                                                                                                                                                                                                                                                                                                                                                                                                                                                                                                                                                                                                                                                                                                                                                                                                                                                                                                                                                                                                                                                                                                                                                                                                                                                                                                                                                                                                                                                                                                                                                                                                                                                                                                                                                                                                                                                                                                     |
| Osgood (1923)<br>Bürger (1924), pg. 54-55<br>von Colditz (1925), pg. 24,25,330,347                                                                                                                                             |                                                                                                                                                                                                                                                                                                                                                                                                                                                                                                                                                                                                                                                                                                                                                                                                                                                                                                                                                                                                                                                                                                                                                                                                                                                                                                                                                                                                                                                                                                                                                                                                                                                                                                                                                                                                                                                                                                                                                                                                                                                                                                                                                                                                                                                                                                                                                                                                                                                                                                                                                                                                                                                                                                                                                                                                                                                                                                                                                                                                                                                                                                                                                                                                                                                                                                                                                                                                                                                                                                                                                                                                                                                                                                                                     |
| Gigoux (1929)<br>Giai (1936), pg. 101                                                                                                                                                                                          |                                                                                                                                                                                                                                                                                                                                                                                                                                                                                                                                                                                                                                                                                                                                                                                                                                                                                                                                                                                                                                                                                                                                                                                                                                                                                                                                                                                                                                                                                                                                                                                                                                                                                                                                                                                                                                                                                                                                                                                                                                                                                                                                                                                                                                                                                                                                                                                                                                                                                                                                                                                                                                                                                                                                                                                                                                                                                                                                                                                                                                                                                                                                                                                                                                                                                                                                                                                                                                                                                                                                                                                                                                                                                                                                     |
| Cabrera and Yepes (1940), pg. 271<br>Krieg (1940)<br>Osgood (1943), pg. 227                                                                                                                                                    |                                                                                                                                                                                                                                                                                                                                                                                                                                                                                                                                                                                                                                                                                                                                                                                                                                                                                                                                                                                                                                                                                                                                                                                                                                                                                                                                                                                                                                                                                                                                                                                                                                                                                                                                                                                                                                                                                                                                                                                                                                                                                                                                                                                                                                                                                                                                                                                                                                                                                                                                                                                                                                                                                                                                                                                                                                                                                                                                                                                                                                                                                                                                                                                                                                                                                                                                                                                                                                                                                                                                                                                                                                                                                                                                     |
| De Agostini (1945)                                                                                                                                                                                                             |                                                                                                                                                                                                                                                                                                                                                                                                                                                                                                                                                                                                                                                                                                                                                                                                                                                                                                                                                                                                                                                                                                                                                                                                                                                                                                                                                                                                                                                                                                                                                                                                                                                                                                                                                                                                                                                                                                                                                                                                                                                                                                                                                                                                                                                                                                                                                                                                                                                                                                                                                                                                                                                                                                                                                                                                                                                                                                                                                                                                                                                                                                                                                                                                                                                                                                                                                                                                                                                                                                                                                                                                                                                                                                                                     |
| Grosse (1949)                                                                                                                                                                                                                  |                                                                                                                                                                                                                                                                                                                                                                                                                                                                                                                                                                                                                                                                                                                                                                                                                                                                                                                                                                                                                                                                                                                                                                                                                                                                                                                                                                                                                                                                                                                                                                                                                                                                                                                                                                                                                                                                                                                                                                                                                                                                                                                                                                                                                                                                                                                                                                                                                                                                                                                                                                                                                                                                                                                                                                                                                                                                                                                                                                                                                                                                                                                                                                                                                                                                                                                                                                                                                                                                                                                                                                                                                                                                                                                                     |
| Housse (1953), pg. 160, 161                                                                                                                                                                                                    |                                                                                                                                                                                                                                                                                                                                                                                                                                                                                                                                                                                                                                                                                                                                                                                                                                                                                                                                                                                                                                                                                                                                                                                                                                                                                                                                                                                                                                                                                                                                                                                                                                                                                                                                                                                                                                                                                                                                                                                                                                                                                                                                                                                                                                                                                                                                                                                                                                                                                                                                                                                                                                                                                                                                                                                                                                                                                                                                                                                                                                                                                                                                                                                                                                                                                                                                                                                                                                                                                                                                                                                                                                                                                                                                     |
| Reichlen (1959)<br>Liebermann (1962)                                                                                                                                                                                           |                                                                                                                                                                                                                                                                                                                                                                                                                                                                                                                                                                                                                                                                                                                                                                                                                                                                                                                                                                                                                                                                                                                                                                                                                                                                                                                                                                                                                                                                                                                                                                                                                                                                                                                                                                                                                                                                                                                                                                                                                                                                                                                                                                                                                                                                                                                                                                                                                                                                                                                                                                                                                                                                                                                                                                                                                                                                                                                                                                                                                                                                                                                                                                                                                                                                                                                                                                                                                                                                                                                                                                                                                                                                                                                                     |
| Iglesias (1965)                                                                                                                                                                                                                |                                                                                                                                                                                                                                                                                                                                                                                                                                                                                                                                                                                                                                                                                                                                                                                                                                                                                                                                                                                                                                                                                                                                                                                                                                                                                                                                                                                                                                                                                                                                                                                                                                                                                                                                                                                                                                                                                                                                                                                                                                                                                                                                                                                                                                                                                                                                                                                                                                                                                                                                                                                                                                                                                                                                                                                                                                                                                                                                                                                                                                                                                                                                                                                                                                                                                                                                                                                                                                                                                                                                                                                                                                                                                                                                     |
| Kolliker Frers (1969)                                                                                                                                                                                                          |                                                                                                                                                                                                                                                                                                                                                                                                                                                                                                                                                                                                                                                                                                                                                                                                                                                                                                                                                                                                                                                                                                                                                                                                                                                                                                                                                                                                                                                                                                                                                                                                                                                                                                                                                                                                                                                                                                                                                                                                                                                                                                                                                                                                                                                                                                                                                                                                                                                                                                                                                                                                                                                                                                                                                                                                                                                                                                                                                                                                                                                                                                                                                                                                                                                                                                                                                                                                                                                                                                                                                                                                                                                                                                                                     |
| Ibar Bruce (1973)<br>Bahre (1979), pg. 32, 77<br>Silveira (1979)<br>Cardich and Miotti (1983)<br>Massone (1984)<br>Serret (1990)<br>Ramirez Morales (1991), pg. 176<br>Saavedra and Simonetti (1991), pg. 253<br>Conway (2005) |                                                                                                                                                                                                                                                                                                                                                                                                                                                                                                                                                                                                                                                                                                                                                                                                                                                                                                                                                                                                                                                                                                                                                                                                                                                                                                                                                                                                                                                                                                                                                                                                                                                                                                                                                                                                                                                                                                                                                                                                                                                                                                                                                                                                                                                                                                                                                                                                                                                                                                                                                                                                                                                                                                                                                                                                                                                                                                                                                                                                                                                                                                                                                                                                                                                                                                                                                                                                                                                                                                                                                                                                                                                                                                                                     |
| Re et al. (2005)<br>Carballo Marina et al. (2008)<br>Guíneo et al. (2008)                                                                                                                                                      |                                                                                                                                                                                                                                                                                                                                                                                                                                                                                                                                                                                                                                                                                                                                                                                                                                                                                                                                                                                                                                                                                                                                                                                                                                                                                                                                                                                                                                                                                                                                                                                                                                                                                                                                                                                                                                                                                                                                                                                                                                                                                                                                                                                                                                                                                                                                                                                                                                                                                                                                                                                                                                                                                                                                                                                                                                                                                                                                                                                                                                                                                                                                                                                                                                                                                                                                                                                                                                                                                                                                                                                                                                                                                                                                     |

|                                  |                                                                                                                                                                                                                          |
|----------------------------------|--------------------------------------------------------------------------------------------------------------------------------------------------------------------------------------------------------------------------|
| Mansur and Piqué (2009), pg. 148 | Tierra del Fuego: archaeozoological record of <b>guanaco and deer</b> , the huemul                                                                                                                                       |
| Aschero (2010), pg. 3            | Archaeological studies confirmed the <b>hunting of both huemul and guanaco in winter</b>                                                                                                                                 |
| Cruz et al. (2010)               | Huemul remains were found at <b>250 km east from forests</b>                                                                                                                                                             |
| Paillan and Tello (2012)         | Huemul usage found at <b>20 km east from forests</b>                                                                                                                                                                     |
| Ale (2014), pg. 78               | Bone of <i>Hippocamelus</i> sp. at <b>30°S in Chile</b>                                                                                                                                                                  |
| Donoso et al. (2017)             | In the past, <b>huemul were common in Patagonian steppe</b>                                                                                                                                                              |
| Flueck and Smith-Flueck (2018)   | Six cases: once a huemul was spotted, a dart was prepared and shot from 10 to 23 m, after 32 to 73 minutes since first seen, as huemul simply ignored the people and remained on the spot; <b>amazingly approachable</b> |
| Teta and Rodríguez (2020)        | Huemul remains found at <b>280 km east from forests</b>                                                                                                                                                                  |

- 
- [1] Flueck, W.T., Smith-Flueck, J.M. Huemul heresies: beliefs in search of supporting data. 1. Historical and zooarcheological considerations. *Anim. Prod. Sci.* **2012**, 52, 685-693.
- [2] Flueck, W.T.; Smith-Flueck, J.M.; Escobar, M.E.; Zuliani, M.; Fuchs, B.; Geist, V.; Heffelfinger, J.R.; Black-Decima, P.; Gizejewski, Z.; Vidal, F.; Barrio, J.; Molinuevo, S.M.; Monjeau, A.J.; Hoby, S. Jiménez, J.E. Loss of migratory traditions makes the endangered Patagonian huemul deer a year-round refugee in its summer habitat. *Conserv.* **2022**, 2, 322-348.

## References for the source used in this table:

Ale, A. A social economic formation of hunter-gatherers in the semiarid northern Chile: A revaluation of San Pedro Viejo of Pichasca site. *Zaranda Ideas* **2014**, 11, 67–88.

Anonymous. Excursión del gobernador del Chubut. *Caras Caretas* **1904**, 7, 58.

Aschero, C.A. Las escenas de caza en Cueva de las Manos: Una perspectiva regional (Santa Cruz, Argentina). In *IFRAO Congress - Symposium: Pleistocene art of the Americas (Pre-Acts)*, **2010**; pp. 1-19.

Bahre, C.J. *Destruction of the Natural Vegetation of North-Central Chile*; University of California Publications in Geography: Berkeley, CA, USA, **1979**; 23, 1–117. ISBN 0-520-09594-4.

Behm, E. Reise im südwestlichen Patagonien von J.T. Rogers und E. Ibar, 1877, nebst den Tagebüchern von A. de Viedma 1782 und J.H. Gardiner 1867. *Petermanns Geogr. Mitteilungen* **1880**, 26, 47-64.

Bürger, O. Aus der Wildnis des Huemuls. Erlebnisse und Abenteuer unter den Kolonisten und Indianern Chiles; Verlag Deutsche Buchwerkstätten: Dresden, Germany, **1924**.

Burmeister, H. The huemul. *Nature* **1873**, 9, 82.

Burmeister, C.V. Nuevos datos sobre el territorio Patagonico de Santa Cruz. *Rev. Museo de la Plata*, **1893**, 4, 227-256 and 338-352.

Burmeister, C.V. *Memoria sobre el territorio de Santa Cruz*. Imprenta La Nación, Ministerio de Agricultura de la Republica Argentina, **1901**.

Cabrera, A.; Yepes, J. *Mamíferos sudamericanos* (1st); Compañía Argentina de Editores, Buenos Aires, Argentina, **1940**, 370 pp.

Carballo Marina, F.; Manzi, L.M.; Campan, P.A.; Belardi, J.B.; Tiberi, P.; Manero, A.; Saenz, J.L. Distribución del registro arqueológico en la cuenca del río Gallegos (Santa Cruz): línea de base y aporte a la preservación del patrimonio. In *Arqueología del Extremo sur del Continente Americano*; Borrero, L.A., Franco, N., Eds.; Editorial Dunken, Buenos Aires, Argentina, **2008**; pp. 175-225.

Cardich, A.; Miotti, L. Recursos Faunísticos en la Economía de los Cazadores-Recolectores de Los Toldos (Provincia de Santa Cruz). *Relaciones Soc. Argent. Antropol.* **1983**, 16, 269-273.

- Church, G.E. A traveller in Patagonia. *Nature* **1903**, 67, 321-322.
- Claraz, M.G. Sur l'Equus bisulcus, de Molina. *Revue et Magasin de Zoologie Pure et Appliquee* **1864**, 241-248.
- Conway, W. *Act III in Patagonia: people and wildlife*; Island Press, Washington DC, USA, **2005**.
- Cox, G.E. Viaje a las regiones septentrionales de la Patagonia: 1862-1863; Imprenta Nacional, Santiago, Chile, **1863**, 266 pp.
- Cruz, I.; Munoz, A.S.; Caracotche, M. A huemul (*Hippocamelus bisulcus*) antler artefact in archaeological deposits of the Atlantic coast. Implications for human mobility and species distribution. *Magallania* **2010**, 38, 287-294.
- de Agostini, A.M. Andes Patagónicos: viajes de exploración a la cordillera Patagónica Austral, Vol. 1; Buenos Aires, Argentina, **1945**, 409 pp.
- Donoso, D.; Iriarte, A.; Segura, B.; Tirado, M. Antecedentes de Huemul (Capítulo 1). In *El Huemul de Aysén y otros rincones*; Iriarte, A.; Donoso, D.S.; Segura, B.; Tirado, M., Eds.; Ediciones Secretaría Regional Ministerial de Agricultura de la Región de Aysén y Flora & Fauna Chile Ltd: Aysen, Chile, **2017**; pp. 13-61.
- Eastman, C.R. Beginnings of American natural history. *Amer. Museum J.* **1915**, 15, 349-355.
- Flueck, W.T.; Smith-Flueck, J.M. Radio marking the first group of endangered Patagonian huemul deer in Argentina. *J. Neotrop. Mammal.* **2018**, 25, 461-465.
- Gay, C. *Historia Física y Política de Chile: Zoología*; Museo de Historia Natural de Santiago, Santiago, Chile, **1847**, 495 pp.
- Giai, A.G. Huemul, inofensivo venado de las soledades cordilleranas de la Patagonia. *Chacra* **1936**, 6, 99-101.
- Gigoux, E.E. El huemul. *Rev. Chilena Hist. Nat.* **1929**, 23, 573-582.
- Grosse, A. El huemul - ciervo de los Andes y emblema del escudo Chileno. *Condor (Revista Chileno Alemana)* **1949**, 12, 10-12.
- Guineo, O.; Guineo Garay, R.; Garay, G. *Conociendo al Huemul de Torres del Paine*; La Prensa Austral: Punta Arenas, Chile, **2008**.
- Hatcher, J.B. Reports of the Princeton University expeditions to Patagonia, 1896-1899. Vol. I: Narrative of the Expeditions. Geography of Southern Patagonia; E. Schweizerbart'sche Verlagshandlung, Stuttgart, Germany, **1903**. 314 pp.
- Housse, P.R. *Animales salvajes de Chile en su clasificación moderna: su vida y sus costumbres*; Ediciones de la Universidad de Chile, Santiago, Chile, **1953**. 189 pp.
- Ibar Bruce, J. *Aisen, hombres y naturaleza*. Imprenta de la Armada, Valparaíso, Chile, **1973**. 164 pp.
- Iglesias, R.E. El huemul. *La Montaña (Arg.)* **1965**, 7, 26-28.

Kolliker Frers, A. Das Waidwerk und die autochthonen Cerviden in Argentinien. In *Parque Diana*; Vogel, C.A., Ed.; Stefan Schwarz Verlag, München, Germany, **1969**; pp. 25-31.

Krieg, H. *Als Zoologe in Steppen und Wäldern Patagoniens*; Bayerischer Landwirtschaftsverlag, Muenchen, Germany, **1940**. 197 pp.

Liebermann, J. Sobre la historia natural del huemul. *Anal. Acad. Argent. Geogr.* **1962**, 6, 157-168.

Lydekker, R. The deer of all lands: a history of the family Cervidae, living and extinct; R. Ward, London, **1898**. 329 pp.

MacDouall, J. *Narratives of a voyage to Patagonia and Terra del Fuego*; Renshaw and Rush, London, **1833**. 320 pp.

Mansur, M.E.; Piqué, R. Between the Forest and the Sea: Hunter-Gatherer Occupations in the Subantarctic Forests in Tierra del Fuego, Argentina. *Arctic Anthropology* **2009**, 46, 144-157.

Massone, M. Los paraderos tehuelches y proto-tehuelches en la costa del Estrecho de Magallanes. *Anales del Instituto de la Patagonia* **1984**, 15, 27-42.

Musters, R.N. A year in Patagonia. *J. Royal Geogr. Soc. London* **1871**, 41, 59-77.

Neveu-Lemaire, M.; Grandidier, G. *Notes sur les mammifères des hauts plateaux de l'Amérique du Sud*; Imprimerie nationale, Paris, **1911**. 127 pp.

Onelli, C. El huemul. Su patria: Su vida. *Rev. Jardín Zool. Buenos Aires* **1905**, 1, 370-374.

Osgood, W.H. The journal of Wilfred Osgood: The Marshall Field Chilean Expedition of **1922-23**. In Patterson, B.D. *Field Museum Nat. Hist. Bull.* **1983**, 54, 8-33.

Osgood, W.H. The mammals of Chile. *Field Museum Nat. Hist., Zool. Series* **1943**, 30, 1-268.

Paillan, J.T.; Tello, G.E. Los recursos naturales y culturales, 28 de Noviembre, Guer Aaike. Santa Cruz: su importancia turística y patrimonial; ICT-UNPA-35-2012, **2012**, 15 pp.

Pennant, T. *History of quadrupeds* (3rd); B & J White, London, **1793**.

Philippi, R.A. Zoología: Sinonimia del huemul. *Anales de la Universidad de Chile* **1873**, pp. 717-722.

Philippi, R.A. El guemul de Chile. *Anal. Museo Nac. Chile, Primera Seccion Zoologica* **1892**, 2, 1-9.

Prichard, H.H. *Through the heart of Patagonia*; D. Appleton and Co., New York, USA, **1902a**. 346 pp.

Prichard, H.H. Field notes upon some of the larger mammals of Patagonia made between September 1900 and June 1901. *Proc. Zool. Soc. Lond.* **1902b**, 1, 272-277.

Ramirez Morales, F. Apuntes para una historia ecológica de Chile. *Cuadernos de Historia* **1991**, 11, 149-196.

Re, A.; Delaunay, A.N.; Ferraro, L. Grabados en la meseta del lago Strobel (provincia de Santa Cruz, Argentina), el sitio laguna del Faldeo Verde. *Relaciones Soc. Argentina Antropol.* XXX **2005**, 30, 245-256.

Reichlen, H. Huemul in Fell's Cave, Chile: Specimen MNHN-2M-MO-1988-211. Museum National d'Histoire Naturelle, Paris (France), **1959**; <http://coldb.mnhn.fr/catalognumber/mnhnizm/mo-1988-211>

Roulin, M. Mémoire pour servir a l'histoire du tapir: et description d'une espece nouvelle (le tapir pinchaque) appartenant aux hautes régions de la Cordillere des Andes. *Mémoires des Savans étrangers* **1835**, 6, 5-112.

Saavedra, B.; Simonetti, J.A. Archaeological evidence of Pudu pudu (Cervidae) in central Chile. *Z. Säugetierkunde* **1991**, 56, 252–253.

Sclater, P.L. Comments about Sclater and *Cervus chilensis*. In *Proceedings of the Scientific Meetings of the Zoological Society of London*; Messrs. Longmans, Green, Reader, and Dyer, London, **1875**, pp. 44-46.

Serret, A. Observaciones preliminares de huemul, *Hippocamelus bisulcus*, en el lago Nansen del Parque Nacional Perito Moreno, Provincia Santa Cruz; Fundacion Vida Silvestre Argentina, **1990**; 23 pp.

Siewert, C. Un viaje a Patagonia. *Boletin Inst. Geogr. Argentino* **1896**, 17, 363-391.

Silveira, M.J. Analisis e Interpretacion de los Restos Faunisticos de la Cueva Grande del Arroyo Feo. *Relaciones Soc. Argent. Antropol.* **1979**, 13, 229-253.

Simmonds, P.L. *A dictionary of useful animals and their products*; E. & F.N. Spon, London, **1883**. 136 pp.

Steffen, H. Viajes de exploracion: Estudio en la Patagonia occidental 1892–1902. *Anal. Univ. Chile* **1910**, 2, 1–419.

Teta, P.; Rodríguez, D. *Mammalogy National Collection (MACNMa)*; Museo Argentino de Ciencias Naturales 'Bernardino Rivadavia' (MACN), Occurrence dataset, **2020**. doi.org/10.15468/ukdxqp

von Colditz, R. *Im Reiche des Kondor*; Paul Parey, Berlin, Germany, **1925**. 415 pp.

Wolffsohn, J.W. Notas sobre el huemul. *Revista Chilena de Historia Natural* **1910**, 14, 227-34.
