# Supplementary material
Source: MDPI journal article supplement (https://www.mdpi.com/2673-7159/3/4/36)
Supplement: s1 [file s1]

**Table S2a Common plant species of the Argentine Patagonian steppe and forage properties related to domestic livestock and native wildlife. Taken from [https://patagonianatural.org.ar/wp-content/uploads/2021/04/Flora\\_de\\_la\\_Esteba.pdf](https://patagonianatural.org.ar/wp-content/uploads/2021/04/Flora_de_la_Esteba.pdf)**

| Common Name    | Scientific Name                               | Plant Type                             | Forage Properties                                                                                                                                                                                                            |
|----------------|-----------------------------------------------|----------------------------------------|------------------------------------------------------------------------------------------------------------------------------------------------------------------------------------------------------------------------------|
| Solupe         | <i>Ephedra ochreatea</i>                      | shrub                                  | -sought after by livestock<br>-quite common in the dunes<br>-edible all year; important winter feed                                                                                                                          |
| Alpataco       | <i>Prosopis alpataco</i>                      | shrub                                  | -the preferred food of native herbivores such as the rheas, tinamou birds, and guanacos.<br>-a very important natural resource for all livestock<br>-the tender foliage and fruits are preferred.                            |
| Barba de Chivo | <i>Prosopidastrum globosum</i>                | shrub                                  | -it is food for wild mammals such as the mara.                                                                                                                                                                               |
| Zampa          | <i>Atriplex lampa</i>                         | shrub                                  | -livestock prefer it as fodder only in those establishments that have abundant fresh water (due to the high concentration of salts in the plant).                                                                            |
| Piquillin      | <i>Condalia microphylla</i>                   | shrub                                  | -young, tender branches are an important component of the diet of sheep and goats.                                                                                                                                           |
| Neneo          | <i>Mulinum spinosum</i>                       | shrub                                  | -sheep consume its flowers.                                                                                                                                                                                                  |
| Yao Yin        | <i>Lycium chilense</i>                        | shrub                                  | -a favorite shrub for livestock and of high nutritional quality, especially the young branches.<br>-the fruits are favored by the rheas.                                                                                     |
| Uña de Gato    | <i>Chuquiraga erinacea subspecies hystrix</i> | shrub                                  | -Guanacos, rheas and sheep occasionally eat the flowers.                                                                                                                                                                     |
| Quilembai      | <i>Chuquiraga avellanadae</i>                 | shrub                                  | -its flowers and fruits are intensively eaten by livestock, especially in the summer in the absence of better forage.<br>- In contrast, the leaves and stems are rejected for their bitter taste and the presence of thorns. |
| Coirón Llama   | <i>Jarava humilis</i>                         | characteristic Patagonian steppe grass | -it is consumed by cattle and horses.<br>-it is not consumed by sheep.                                                                                                                                                       |
| Coirón Poa     | <i>Poa ligularis</i>                          | perennial grass                        | -fresh shoots are valuable for livestock.                                                                                                                                                                                    |
| Olivillo       | <i>Hyalis argentea</i>                        | perennial herb                         | -it is consumed by goats and wildlife.                                                                                                                                                                                       |

**Table S2b     Plant species listed for the phytogeographic Patagonian Province [1]**

|                               |                               |
|-------------------------------|-------------------------------|
| <i>Adesmia volckmannii</i>    | <i>Lycium ameghinoi</i>       |
| <i>Azorella prolifera</i>     | <i>Mulguraea ligustrina</i>   |
| <i>Azorella monantha</i>      | <i>Mulguraea tridens</i>      |
| <i>Bromus setifolius</i>      | <i>Nassauvia glomerulosa</i>  |
| <i>Chuquiraga aurea</i>       | <i>Pappostipa humilis</i>     |
| <i>Chuquiraga morenonis</i>   | <i>Pappostipa speciosa</i>    |
| <i>Chuquiraga avellanadae</i> | <i>Pappostipa ibarii</i>      |
| <i>Festuca pyrogea</i>        | <i>Petunia patagonica</i>     |
| <i>Festuca pallescens</i>     | <i>Poa ligularis</i>          |
| <i>Festuca gracillima</i>     | <i>Poa spiciformis</i>        |
| <i>Hordeum comosum</i>        | <i>Prosopis denudans</i>      |
| <i>Jarava neaei</i>           | <i>Rytidosperma virescens</i> |
| <i>Koeleria vurilochensis</i> | <i>Senecio filaginoides</i>   |
| <i>Lycium chilense</i>        |                               |

[1] Bisigato, A.J.; Bertiller, M.B. Vegetation of Patagonia. In *Lizards of Patagonia. Natural and Social Sciences of Patagonia*; Morando, M.; Avila, L.J., Eds.; Springer Nature: Cham, Switzerland, 2020; pp. 85-102.
